# Supplementary material for: Optimization of grain import market layout in the context of food security: a study of soybean in China
Source: Frontiers journal article supplement (doi:10.3389/fsufs.2025.1549463), 2025-04-10
Supplement: Table_1.docx [file Table_1.docx]

Supplementary Material

# Supplementary Figures

**Supplementary Figure 1.** The seasonal distribution of China’s soybean imports from the southern and northern hemispheres.

Notes: Since 2001, China has imported over 99% of its soybeans from the United States, Brazil, Argentina, Canada, Uruguay, Russia, and Ukraine. Notably, the US-China trade disputes occurred in 2018. Therefore, the monthly quantities of China’s soybean imports from the above seven countries in the years 2011 to 2017, and 2020 to 2022 is selected to plotted.

Data Source: Collated according to UN Comtrade statistics.

**Supplementary Figure 2.** Average values of Pareto optimal solutions in 2020.

Notes: “Actual import” refers to the actual proportion of China’s soybean imports from other countries in 2020. “Actual import optimization” refers to the optimal proportion of China’s soybean imports from other countries in 2020. “Scenario 1” and “Scenario 2” refer to the optimal proportion of China’s soybean imports from other countries under the scenario of increasing soybean export availability from Russia and Kazakhstan, respectively.

Data Source: Calculated and collated by the author.
